# Supplementary material for: Geopotential field anomalies and regional tectonic features – two case studies: southern Africa and Germany
Source: Copernicus journal article supplement (doi:10.5194/se-2015-132), 2016-01-20
Supplement: Supplementary file 1 [file se-2015-132-supplement.pdf]

# S1 Different lithospheric field estimates

This supplement contains tables with all the different lithospheric field estimates for the individual field components discussed in the main text.

## S1.1 Southern Africa

Table S1: Repeat station lithospheric anomaly values without magnetospheric correction for the southern African region.

| Nr   | X [nT]  | $\sigma$ X [nT] | Y [nT]  | $\sigma$ Y [nT] | Z [nT]  | $\sigma$ Z [nT] | F [nT]  | $\sigma$ F [nT] | *Nr. of data | Code |
|------|---------|-----------------|---------|-----------------|---------|-----------------|---------|-----------------|--------------|------|
| OBS1 | 5.69    | 10.21           | 13.16   | 3.67            | 19.43   | 4.90            | -17.64  | 1.49            | 9            | HER  |
| OBS2 | 69.15   | 11.92           | -25.15  | 7.15            | 43.18   | 4.91            | -5.52   | 5.18            | 9            | HBK  |
| OBS3 | 20.33   | 10.31           | -46.02  | 4.97            | 91.51   | 3.91            | -66.80  | 2.64            | 9            | TSU  |
| 1    | -1.87   | 8.26            | -17.58  | 6.05            | 62.62   | 2.47            | -54.03  | 4.25            | 4            | hum  |
| 2    | -43.61  | 9.59            | -92.01  | 5.01            | 3.68    | 3.35            | -3.08   | 2.80            | 4            | geo  |
| 3    | -62.90  | 5.90            | -30.43  | 2.04            | 100.77  | 3.84            | -109.02 | 0.88            | 4            | gon  |
| 4    | 38.67   | 3.26            | -47.57  | 4.49            | -94.82  | 0.92            | 108.79  | 0.55            | 3            | kar  |
| 5    | 62.97   | 9.68            | -25.89  | 3.48            | -79.61  | 3.66            | 101.12  | 2.17            | 5            | cra  |
| 6    | -36.07  | 13.40           | -7.55   | 2.98            | -82.95  | 1.29            | 63.29   | 4.19            | 5            | wil  |
| 7    | -120.92 | 12.49           | -131.11 | 2.90            | 58.98   | 2.60            | -78.56  | 4.48            | 4            | fon  |
| 8    | -7.74   | 5.99            | 75.53   | 3.74            | 43.34   | 1.59            | -53.52  | 1.50            | 5            | gar  |
| 9    | 108.56  | 8.26            | -135.24 | 4.91            | 141.75  | 1.92            | -68.44  | 2.83            | 4            | blo  |
| 10   | -151.11 | 9.83            | -104.06 | 4.09            | -3.95   | 2.58            | -39.36  | 1.91            | 4            | und  |
| 11   | -16.35  | 5.36            | -56.65  | 3.46            | 114.71  | 1.25            | -100.46 | 1.86            | 2            | lad  |
| 12   | -46.88  | 8.15            | 8.34    | 2.49            | 48.20   | 0.25            | -63.29  | 3.12            | 4            | dou  |
| 13   | 64.69   | 6.65            | -154.69 | 2.79            | 15.05   | 1.08            | 31.44   | 2.89            | 4            | ale  |
| 14   | 167.51  | 21.59           | 186.18  | 6.70            | -296.04 | 2.95            | 310.57  | 6.59            | 2            | upi  |
| 15   | -117.39 | 5.20            | 86.70   | 4.59            | 18.60   | 4.44            | -81.70  | 3.53            | 3            | stl  |
| 16   | -90.44  | 9.04            | -42.98  | 3.83            | 119.23  | 3.02            | -137.82 | 2.35            | 5            | pie  |
| 17   | 86.97   | 11.17           | -9.16   | 1.04            | -184.31 | 4.24            | 203.12  | 2.97            | 4            | lud  |
| 18   | 189.97  | 20.33           | 156.11  | 4.82            | -72.19  | 3.02            | 123.66  | 6.24            | 5            | sev  |
| 19   | -12.90  | 17.26           | 66.86   | 3.41            | 158.18  | 4.81            | -156.43 | 3.29            | 5            | sos  |
| 20   | -31.00  | 9.36            | -137.28 | 3.71            | -20.99  | 1.93            | 21.73   | 2.81            | 5            | uni  |
| 21   | 76.39   | 10.52           | -72.07  | 3.08            | 195.27  | 3.17            | -126.70 | 2.33            | 2            | mic  |
| 22   | -18.65  | 12.82           | -142.09 | 6.18            | -193.57 | 3.25            | 181.77  | 3.94            | 5            | tsh  |
| 23   | 5.13    | 15.67           | -51.38  | 4.67            | -275.50 | 4.40            | 253.17  | 4.30            | 5            | khu  |
| 24   | -178.90 | 5.65            | -323.50 | 3.36            | -598.56 | 3.21            | 485.46  | 2.07            | 5            | tom  |
| 25   | 151.83  | 6.17            | 146.76  | 7.50            | -70.11  | 1.06            | 112.60  | 2.45            | 2            | swa  |
| 26   | -43.13  | 11.58           | 34.68   | 3.32            | -18.38  | 4.59            | -5.21   | 2.69            | 5            | win  |
| 27   | -40.07  | 10.35           | 28.38   | 4.69            | 4.69    | 2.05            | -24.21  | 2.86            | 5            | gob  |
| 28   | 95.81   | 13.75           | 1.06    | 5.71            | 82.12   | 4.18            | -25.47  | 3.88            | 4            | mes  |
| 29   | -22.41  | 8.02            | 10.67   | 6.20            | 77.58   | 2.58            | -79.99  | 3.34            | 5            | gha  |
| 30   | -33.05  | 9.65            | -3.08   | 2.55            | 56.69   | 4.19            | -65.09  | 3.89            | 4            | ora  |
| 31   | 100.52  | 18.46           | -68.82  | 7.29            | 426.37  | 5.96            | -314.01 | 5.32            | 4            | fra  |
| 32   | 177.55  | 9.38            | -310.03 | 1.59            | -391.33 | 1.76            | 459.50  | 2.84            | 4            | uga  |
| 33   | 40.66   | 3.68            | 93.96   | 2.40            | -108.48 | 2.38            | 106.65  | 1.90            | 4            | mau  |
| 34   | 51.20   | 8.18            | -73.93  | 1.67            | 20.31   | 2.21            | 12.81   | 3.30            | 3            | tsk  |
| 35   | -10.39  | 15.34           | 28.03   | 2.53            | 79.02   | 2.65            | -76.54  | 5.09            | 4            | oka  |
| 36   | 86.26   | 4.73            | -22.91  | 2.16            | 77.84   | 2.00            | -18.96  | 1.36            | 3            | mpa  |
| 37   | -43.15  | 12.56           | -118.47 | 2.05            | -33.88  | 5.04            | 18.04   | 1.82            | 4            | rua  |

Magnetic field components X, Y, Z and F with their standard deviations  $\sigma$ , \* Number of used data points in time series.

Table S2: Observatory and repeat station lithospheric anomaly values with magnetospheric correction for the southern African region.

| Nr   | X [nT]  | $\sigma$ X [nT] | Y [nT]  | $\sigma$ Y [nT] | Z [nT]  | $\sigma$ Z [nT] | F [nT]  | $\sigma$ F [nT] | *Nr. of data | Code |
|------|---------|-----------------|---------|-----------------|---------|-----------------|---------|-----------------|--------------|------|
| OBS1 | 25.33   | 2.06            | 9.40    | 1.84            | 32.91   | 1.74            | -21.99  | 2.61            | 9            | HER  |
| OBS2 | 90.31   | 3.73            | -28.86  | 5.45            | 54.06   | 3.84            | -5.66   | 5.26            | 9            | HBK  |
| OBS3 | 42.79   | 2.68            | -49.76  | 3.49            | 99.24   | 2.32            | -62.52  | 2.24            | 9            | TSU  |
| 1    | 5.62    | 5.70            | -18.69  | 6.63            | 70.07   | 2.42            | -57.68  | 4.19            | 4            | hum  |
| 2    | -31.39  | 4.54            | -94.07  | 4.07            | 14.23   | 3.00            | -7.67   | 3.69            | 4            | geo  |
| 3    | -53.94  | 3.32            | -31.56  | 2.04            | 109.07  | 2.52            | -112.74 | 0.71            | 4            | gon  |
| 4    | 45.43   | 1.14            | -48.64  | 4.86            | -88.92  | 0.92            | 106.12  | 1.35            | 3            | kar  |
| 5    | 75.51   | 5.99            | -28.19  | 3.19            | -69.89  | 2.53            | 97.61   | 2.13            | 5            | cra  |
| 6    | -27.57  | 6.57            | -8.78   | 1.95            | -77.01  | 2.11            | 61.26   | 3.98            | 5            | wil  |
| 7    | -108.27 | 9.59            | -133.39 | 3.04            | 66.82   | 2.87            | -80.46  | 3.28            | 4            | fon  |
| 8    | 2.03    | 2.43            | 73.95   | 3.67            | 50.35   | 0.67            | -56.09  | 1.19            | 5            | gar  |
| 9    | 114.40  | 2.97            | -136.02 | 5.14            | 146.71  | 1.87            | -70.66  | 1.91            | 4            | blo  |
| 10   | -137.31 | 4.07            | -106.31 | 6.23            | 6.46    | 4.89            | -42.67  | 2.38            | 4            | und  |
| 11   | -1.52   | 2.52            | -59.06  | 1.66            | 123.75  | 0.33            | -102.19 | 0.19            | 2            | lad  |
| 12   | -39.90  | 3.05            | 7.23    | 3.47            | 53.56   | 2.85            | -65.24  | 2.60            | 4            | dou  |
| 13   | 72.91   | 3.21            | -156.01 | 2.30            | 20.73   | 1.67            | 29.49   | 2.97            | 4            | ale  |
| 14   | 185.77  | 3.60            | 182.96  | 3.08            | -285.94 | 3.58            | 308.91  | 5.05            | 2            | upi  |
| 15   | -110.76 | 2.09            | 86.13   | 5.03            | 24.24   | 2.29            | -83.78  | 3.08            | 3            | stl  |
| 16   | -77.43  | 5.43            | -44.89  | 3.70            | 128.23  | 3.47            | -139.91 | 2.50            | 5            | pie  |
| 17   | 101.51  | 3.21            | -11.64  | 2.89            | -175.59 | 3.34            | 201.02  | 2.98            | 4            | lud  |
| 18   | 198.36  | 8.03            | 154.95  | 2.69            | -67.08  | 1.79            | 122.58  | 4.79            | 5            | sev  |
| 19   | 0.22    | 4.38            | 64.74   | 2.92            | 165.87  | 1.54            | -157.93 | 2.83            | 5            | sos  |
| 20   | -19.03  | 3.36            | -139.13 | 3.78            | -14.27  | 1.93            | 20.78   | 2.33            | 5            | uni  |
| 21   | 95.00   | 1.08            | -75.13  | 1.60            | 206.18  | 1.19            | -127.36 | 1.65            | 2            | mic  |
| 22   | -2.93   | 2.98            | -144.81 | 3.90            | -185.18 | 4.72            | 181.21  | 3.90            | 5            | tsh  |
| 23   | 17.23   | 2.20            | -53.00  | 3.48            | -269.04 | 4.10            | 252.95  | 3.70            | 5            | khu  |
| 24   | -167.39 | 4.29            | -325.17 | 2.56            | -592.02 | 3.23            | 485.18  | 1.54            | 5            | tom  |
| 25   | 158.62  | 0.22            | 145.69  | 6.35            | -65.57  | 1.17            | 111.46  | 1.66            | 2            | swa  |
| 26   | -29.54  | 4.05            | 32.32   | 1.67            | -11.47  | 2.08            | -5.37   | 1.91            | 5            | win  |
| 27   | -26.55  | 3.17            | 26.17   | 4.73            | 11.84   | 2.04            | -24.53  | 2.06            | 5            | gob  |
| 28   | 107.66  | 4.79            | -0.59   | 5.52            | 88.93   | 2.36            | -25.57  | 2.98            | 4            | mes  |
| 29   | -11.19  | 3.88            | 9.12    | 6.14            | 83.43   | 2.82            | -79.97  | 2.55            | 5            | gha  |
| 30   | -23.10  | 4.60            | -4.40   | 1.52            | 61.98   | 4.10            | -64.89  | 3.14            | 4            | ora  |
| 31   | 115.80  | 7.11            | -71.07  | 5.67            | 434.16  | 1.46            | -313.20 | 3.97            | 4            | fra  |
| 32   | 193.34  | 3.74            | -312.56 | 2.80            | -383.88 | 3.88            | 460.02  | 2.06            | 4            | uga  |
| 33   | 51.24   | 1.49            | 92.55   | 2.33            | -103.35 | 1.45            | 107.41  | 1.21            | 4            | mau  |
| 34   | 63.67   | 5.10            | -75.70  | 1.03            | 26.12   | 1.65            | 13.83   | 3.30            | 3            | tsk  |
| 35   | 1.09    | 3.35            | 26.28   | 0.61            | 84.28   | 1.86            | -75.57  | 2.32            | 4            | oka  |
| 36   | 92.12   | 3.72            | -23.49  | 2.44            | 81.32   | 1.79            | -18.80  | 1.28            | 3            | mpa  |
| 37   | -23.82  | 6.50            | -121.44 | 4.52            | -25.86  | 1.79            | 21.03   | 2.57            | 4            | rua  |

Magnetic field components X, Y, Z and F with their standard deviations  $\sigma$ , \* Number of used data points in time series.

Table S3: Comparison of X and Y lithospheric anomaly estimates for the southern African region.

| Data-X | R-SCHA-X | X-EMM-720 | X-EMM-200 | Data-Y | R-SCHA-Y | Y-EMM-720 | Y-EMM-200 | Code |
|--------|----------|-----------|-----------|--------|----------|-----------|-----------|------|
| 5.6    | -15.8    | 13.3      | -50       | -18.7  | 9.7      | -10.9     | -2.4      | hum  |
| -31.4  | -47.0    | -37       | -53.9     | -94.1  | 4.5      | -40       | -19.6     | geo  |
| -53.9  | -46.1    | -36.4     | -14.4     | -31.6  | -75.2    | -68       | -34.2     | gon  |
| 45.4   | 71.4     | 58.4      | 20.7      | -48.6  | -59.6    | -40.4     | -42.7     | kar  |
| 75.5   | -74.7    | 9.1       | 16.1      | -28.2  | 56.5     | 1.4       | 13.2      | cra  |
| -27.6  | 75.0     | -6.4      | -16       | -8.8   | -6.3     | 0.5       | 22.4      | wil  |
| -108.3 | 100.2    | -14.7     | 7.8       | -133.4 | -40.5    | -101.4    | 0.8       | fon  |
| 2      | 40.2     | 27        | -7.7      | 74     | -65.7    | 10.4      | 25        | gar  |
| 114.4  | -143.4   | -35.6     | -20.5     | -136   | 2.0      | -50.8     | -7.3      | blo  |
| -137.3 | -21.4    | -58.3     | -25.7     | -106.3 | -140.5   | -91.8     | -73.2     | und  |
| -1.5   | -30.6    | -19.4     | -16       | -59.1  | -42.9    | -18.3     | -32.5     | lad  |
| -39.9  | -7.8     | -0.1      | -11.7     | 7.2    | 80.4     | -11.8     | 66.5      | dou  |
| 72.9   | -131.3   | -32.2     | -11.9     | -156   | -101.2   | -88.4     | -69.1     | ale  |
| 185.8  | -123.9   | 11.9      | 14.5      | 183    | -207.8   | -12.9     | -35.7     | upi  |
| -110.8 | -103.1   | -80.1     | 10.6      | 86.1   | -6.7     | 25.6      | -18.4     | stl  |
| -77.4  | 37.7     | 7.4       | 2.9       | -44.9  | 212.0    | 52.5      | -17.7     | pie  |
| 101.5  | 28.8     | 30.8      | 22.2      | -11.6  | -102.0   | -62.1     | -18.3     | lud  |
| 198.4  | -115.9   | 1.7       | -18.5     | 155    | 26.7     | 105.2     | 1.1       | sev  |
| 0.2    | 45.6     | 14.4      | 20.8      | 64.7   | -21.9    | 4.5       | 5.8       | sos  |
| -19    | 39.7     | 15        | 45.3      | -139.1 | -45.5    | -104.7    | -28.7     | uni  |
| 95     | 89.2     | 97.1      | 22        | -75.1  | -52.9    | -54.3     | -51.3     | mic  |
| -2.9   | 103.8    | 54.8      | 47.8      | -144.8 | -41.7    | -83.7     | -16.5     | tsh  |
| 17.2   | 95.3     | 47.3      | 35.8      | -53    | -96.5    | -24.1     | -23.1     | khu  |
| -167.4 | 258.1    | 165.3     | -32.6     | -325.2 | 111.2    | -25       | 28.2      | tom  |
| 158.6  | 224.3    | 173.8     | 52.1      | 145.7  | -73.4    | -22.4     | 8         | swa  |
| -29.5  | 52.2     | 22.4      | 0.2       | 32.3   | 72.4     | -5.2      | -2        | win  |
| -26.6  | -7.5     | -14.5     | -18       | 26.2   | 91.6     | 39.3      | 18.2      | gob  |
| 107.7  | -114.8   | -78.7     | -75.5     | -0.6   | -77.7    | -63.9     | -7.1      | mes  |
| -11.2  | -53.2    | -11.2     | -52.7     | 9.1    | -23.7    | -16.3     | -24.9     | gha  |
| -23.1  | -14.9    | 0         | -19.2     | -4.4   | -81.3    | -10.7     | -27.9     | ora  |
| 115.8  | -109.5   | -8.6      | 8.1       | -71.1  | 13.5     | -18.2     | -13.9     | fra  |
| 193.3  | -7.6     | 62        | -6.6      | -312.6 | 58.6     | -28.2     | 42.9      | uga  |
| 51.2   | -87.6    | 32        | 13.4      | 92.6   | -66.5    | 20        | -11.8     | mau  |
| 63.7   | 181.5    | 72.8      | -28.4     | -75.7  | -106.1   | -31       | -25.3     | tsm  |
| 1.1    | 3.2      | -2.5      | 4.6       | 26.3   | -2.2     | 41.2      | 3.2       | oka  |
| 92.1   | 52.1     | 42.8      | 42.8      | -23.5  | -33.1    | -73.5     | -45.2     | mpa  |
| -23.8  | -23.8    | 47.8      | 71.5      | -121.4 | 18.5     | -37.9     | -38.3     | rua  |
| 25.3   | 72.0     | 33.3      | 34.6      | 9.4    | 10.1     | 18        | 4.5       | HER  |
| 90.3   | 18.8     | 77.2      | -58.4     | -28.9  | -37.4    | -19       | -0.2      | HBK  |
| 42.8   | 84.9     | 59.9      | 34        | -49.8  | -110.5   | -62.3     | -47.1     | TSU  |

Magnetic field components X and Y from ground data (Data), regional model (R-SCHA) and global model (EMM) up to spherical harmonic degree and order 720 or 200, respectively.

Table S4: Comparison of Z and F lithospheric anomaly estimates for the southern African region

| Data-Z | R-SCHA-Z | Z-EMM-720 | Z-EMM-200 | Data-F | $\delta F$ | F-EMM-720 | F-EMM-200 | Code |
|--------|----------|-----------|-----------|--------|------------|-----------|-----------|------|
| 70.1   | 90.2     | 71.1      | 107.1     | -57.7  | 3          | -56.9     | -115.4    | hum  |
| 14.2   | 41.5     | 32.9      | 97.8      | -7.7   | 29         | -36.5     | -105.5    | geo  |
| 109.1  | 63.9     | 74.8      | 61.1      | -112.7 | -41        | -67.7     | -53.6     | gon  |
| -88.9  | -45.5    | -75.6     | -29       | 106.1  | 156        | 97.6      | 41.4      | kar  |
| -69.9  | -20.8    | -50.4     | -95.9     | 97.6   | 102        | 48.8      | 90.4      | cra  |
| -77    | 12.2     | -116.3    | -7.1      | 61.3   | 112        | 103.7     | -3.1      | wil  |
| 66.8   | -37.2    | -3.1      | -19       | -80.5  | -31        | 13.8      | 20.2      | fon  |
| 50.4   | -76.9    | -40.3     | -23       | -56.1  | 42         | 45.5      | 14.6      | gar  |
| 146.7  | 72.8     | 42.3      | 55.7      | -70.7  | -16        | -44.7     | -57.6     | blo  |
| 6.5    | -15.2    | 10.7      | -0.5      | -42.7  | -12        | -16.8     | 3.1       | ung  |
| 123.8  | -37.6    | 41.9      | 5         | -102.2 | -84        | -42.5     | -5.6      | lad  |
| 53.6   | 115.9    | 51.2      | 117.3     | -65.2  | -19        | -44.7     | -120.8    | dou  |
| 20.7   | 246.0    | 116.9     | 31.4      | 29.5   | 79         | -107.7    | -24.2     | ale  |
| -285.9 | -269.8   | -163.4    | -47.8     | 308.9  | 283        | 155.3     | 54.1      | upi  |
| 24.2   | 14.6     | 4         | -28.2     | -83.8  | -59        | -42.2     | 32.8      | stl  |
| 128.2  | 147.9    | 203.5     | 98.5      | -139.9 | -76        | -185.6    | -83.3     | pie  |
| -175.6 | 151.4    | 21.8      | 47.6      | 201    | 171        | -0.7      | -32.9     | lud  |
| -67.1  | -350.7   | -50.7     | -65.2     | 122.6  | 171        | 33.5      | 51.4      | sev  |
| 165.9  | -124.1   | 39.7      | 34        | -157.9 | 32         | -30.9     | -23.2     | sos  |
| -14.3  | 25.0     | -7.5      | -59.1     | 20.8   | 177        | 24.6      | 75.3      | uni  |
| 206.2  | 3.2      | 75.4      | 29.1      | -127.4 | -74        | -13.8     | -8.5      | mic  |
| -185.2 | -134.3   | -88.3     | -23.7     | 181.2  | 252        | 111.7     | 43.4      | tsh  |
| -269   | 47.3     | -47.9     | -1.4      | 253    | 249        | 66.2      | 19.6      | khu  |
| -592   | 276.8    | -120      | 49.5      | 485.2  | 359        | 184.9     | -61.9     | tom  |
| -65.6  | -190.4   | -96.2     | -48.7     | 111.5  | 134        | 162.1     | 65        | swa  |
| -11.5  | 39.6     | 18.9      | 59.1      | -5.4   | 120        | -6.9      | -52.9     | win  |
| 11.8   | -9.9     | -7.6      | -19.4     | -24.5  | 79         | -3.2      | 7.8       | gob  |
| 88.9   | -172.0   | -123.3    | 5.2       | -25.6  | -101       | 77.1      | -39.9     | mes  |
| 83.4   | 84.2     | 105.2     | 22.7      | -80    | 30         | -96.9     | -41.7     | gha  |
| 62     | -79.0    | -25.3     | -10.6     | -64.9  | 28         | 23.1      | 2.8       | ora  |
| 434.2  | -361.9   | -72.7     | -27.8     | -313.2 | 285        | 60.8      | 29.4      | fra  |
| -383.9 | -133.8   | -205.1    | -7        | 460    | 431        | 213.2     | -0.7      | uga  |
| -103.4 | -15.4    | -74.8     | -65       | 107.4  | 169        | 79        | 64        | mau  |
| 26.1   | -53.0    | -156.2    | 12.2      | 13.8   | 190        | 173.9     | -22.2     | tsm  |
| 84.3   | 112.0    | 111.0     | 68.1      | -75.6  | 29         | -102      | -57.9     | oka  |
| 81.3   | 37.1     | 10.5      | 21.3      | -18.8  | 128        | 18.7      | 7.6       | mpa  |
| -25.9  | 39.5     | 20.2      | 40.3      | 21     | 358        | 9.4       | 3.9       | rua  |
| 32.9   | -76.6    | 28.7      | 33.9      | -22    | 30         | -16.9     | -18.8     | HER  |
| 54.1   | -25.8    | 139.5     | 4         | -5.7   | 22         | -88.2     | -28.7     | HBK  |
| 99.2   | 60.1     | 59.9      | 15.4      | -62.5  | 82         | -18.9     | 6.5       | TSU  |

Magnetic field components Z and F from ground data (Data), regional model (R-SCHA) or high resolution aeromagnetic map ( $\delta F$ ) and global model (EMM) up to spherical harmonic degree and order 720 or 200, respectively.

## S1.2 Germany

Table S5: Repeat station lithospheric anomaly values without magnetospheric correction for Germany.

| Nr | X [nT]  | $\sigma$ X [nT] | Y [nT] | $\sigma$ Y [nT] | Z [nT]  | $\sigma$ Z [nT] | F [nT] | $\sigma$ F [nT] | *Nr. of data | Code |
|----|---------|-----------------|--------|-----------------|---------|-----------------|--------|-----------------|--------------|------|
| 1  | 103.38  | 5.94            | -96.10 | 2.87            | 125.58  | 6.19            | 153.54 | 3.75            | 3            | lis  |
| 2  | 12.12   | 1.05            | 87.57  | 1.99            | -15.20  | 4.11            | -9.15  | 3.41            | 2            | eis  |
| 3  | 96.37   | 6.40            | 51.21  | 1.21            | 114.71  | 8.88            | 142.12 | 6.46            | 3            | alt  |
| 4  | -19.72  | 6.52            | -32.33 | 3.56            | -32.83  | 6.35            | -38.01 | 3.73            | 5            | ban  |
| 5  | 33.70   | 6.17            | -19.25 | 2.35            | -95.68  | 6.72            | -77.57 | 4.43            | 5            | kan  |
| 6  | 104.62  | 1.48            | -44.46 | 1.91            | 25.78   | 0.33            | 61.80  | 0.13            | 2            | hel  |
| 7  | 66.54   | 0.30            | 82.61  | 0.51            | 88.06   | 0.68            | 107.34 | 0.72            | 2            | bug  |
| 8  | 7.03    | 6.05            | -59.30 | 2.98            | -72.35  | 8.02            | -65.55 | 5.50            | 5            | kam  |
| 9  | 75.90   | 2.55            | -3.53  | 0.36            | 144.07  | 4.70            | 161.79 | 3.46            | 2            | bot  |
| 10 | 45.83   | 7.04            | 46.15  | 1.91            | -60.86  | 7.21            | -39.84 | 4.26            | 8            | WNG  |
| 11 | -8.61   | 4.66            | 25.82  | 4.21            | -3.80   | 5.59            | -6.60  | 3.73            | 3            | bor  |
| 12 | 105.84  | 4.47            | 31.00  | 2.42            | -120.57 | 4.62            | -72.77 | 3.12            | 4            | kob  |
| 13 | 69.51   | 4.94            | -26.89 | 1.24            | -37.34  | 5.26            | -9.24  | 3.28            | 4            | goe  |
| 14 | 18.85   | 4.57            | -18.71 | 2.44            | -114.71 | 5.03            | -99.85 | 3.19            | 4            | tan  |
| 15 | 52.05   | 7.27            | 31.26  | 3.78            | 150.73  | 6.17            | 159.69 | 3.27            | 4            | hop  |
| 16 | -23.37  | 8.10            | 26.73  | 3.68            | -53.79  | 8.83            | -58.54 | 5.36            | 3            | eml  |
| 17 | -15.68  | 1.05            | -31.11 | 0.66            | -55.61  | 3.06            | -57.88 | 2.06            | 2            | jeg  |
| 18 | -23.40  | 4.60            | 10.35  | 3.35            | -64.99  | 5.22            | -68.95 | 3.32            | 4            | lie  |
| 19 | -30.53  | 6.69            | 0.78   | 2.43            | -70.10  | 6.96            | -76.55 | 4.10            | 8            | NGK  |
| 20 | 23.53   | 9.38            | 16.17  | 4.16            | -24.19  | 9.21            | -13.13 | 4.83            | 3            | tel  |
| 21 | -35.41  | 8.29            | 8.98   | 0.73            | -45.92  | 13.04           | -55.92 | 8.92            | 3            | sch  |
| 22 | -8.09   | 9.73            | 11.27  | 4.48            | -50.85  | 7.50            | -49.99 | 3.10            | 3            | kee  |
| 23 | -24.34  | 8.59            | 17.79  | 2.48            | -43.01  | 7.26            | -48.91 | 3.33            | 3            | cla  |
| 24 | -39.42  | 6.74            | 23.86  | 3.14            | -51.33  | 6.99            | -62.40 | 3.88            | 4            | ggt  |
| 25 | -177.19 | 7.73            | 56.32  | 2.50            | -12.02  | 8.71            | -79.62 | 4.94            | 4            | col  |
| 26 | -89.60  | 7.77            | -61.12 | 2.81            | 7.80    | 7.34            | -29.03 | 3.75            | 4            | deu  |
| 27 | 43.07   | 5.87            | -37.10 | 4.33            | -2.47   | 9.49            | 14.47  | 6.59            | 4            | die  |
| 28 | -30.78  | 7.71            | 4.61   | 3.44            | -50.58  | 7.44            | -58.66 | 3.70            | 3            | eub  |
| 29 | -14.65  | 7.39            | 22.91  | 4.92            | 145.32  | 6.88            | 127.36 | 3.34            | 4            | gru  |
| 30 | -36.96  | 9.65            | 25.05  | 4.61            | -13.07  | 6.24            | -26.79 | 1.86            | 4            | obe  |
| 31 | -59.73  | 7.73            | -6.38  | 5.94            | -52.38  | 8.15            | -72.07 | 4.93            | 5            | sos  |
| 32 | -34.70  | 6.68            | -18.81 | 4.24            | -45.40  | 7.25            | -55.81 | 4.05            | 5            | eil  |
| 33 | -37.80  | 7.48            | -40.84 | 4.13            | -23.87  | 5.64            | -37.41 | 2.21            | 5            | ebe  |
| 34 | 16.60   | 8.89            | -86.08 | 3.38            | 37.28   | 5.53            | 40.82  | 2.41            | 5            | rad  |
| 35 | -0.04   | 6.83            | -4.62  | 3.40            | -36.25  | 6.39            | -33.13 | 3.35            | 5            | won  |
| 36 | 12.67   | 7.18            | -31.30 | 6.38            | 17.95   | 5.26            | 21.57  | 1.85            | 4            | nos  |
| 37 | 79.60   | 8.35            | -20.88 | 5.64            | 95.12   | 5.94            | 119.72 | 2.23            | 5            | mer  |
| 38 | -23.91  | 7.85            | -19.26 | 6.04            | -26.47  | 7.32            | -34.32 | 3.64            | 5            | gai  |
| 39 | -17.88  | 8.76            | 20.06  | 2.17            | 27.48   | 6.46            | 17.12  | 2.02            | 4            | ber  |
| 40 | -35.73  | 5.45            | -18.00 | 1.66            | -2.26   | 8.47            | -17.68 | 5.59            | 3            | poi  |
| 41 | -23.93  | 6.34            | -20.18 | 3.83            | 10.76   | 5.62            | -0.78  | 2.68            | 5            | wit  |
| 42 | -1.64   | 4.12            | -27.09 | 3.02            | 23.26   | 4.00            | 20.38  | 1.75            | 5            | BFO  |
| 43 | -25.29  | 6.86            | -5.76  | 2.03            | 20.01   | 5.76            | 6.88   | 2.62            | 8            | FUR  |
| 44 | -69.90  | 6.23            | 17.87  | 4.13            | 105.81  | 7.42            | 64.51  | 4.10            | 4            | kar  |
| 45 | 0.37    | 7.57            | -31.81 | 2.43            | 53.70   | 7.48            | 48.02  | 3.71            | 4            | oet  |
| 46 | -26.58  | 8.72            | 15.14  | 1.25            | -25.18  | 5.22            | -33.89 | 1.23            | 2            | lin  |

Magnetic field components X, Y, Z and F with their standard deviations  $\sigma$ , \* Number of used data points in time series.

Table S6: Repeat station lithospheric anomaly values with magnetospheric correction for Germany.

| Nr | X [nT]  | $\sigma X$ [nT] | Y [nT] | $\sigma Y$ [nT] | Z [nT]  | $\sigma Z$ [nT] | F [nT]  | $\sigma F$ [nT] | *Nr. of data | Code |
|----|---------|-----------------|--------|-----------------|---------|-----------------|---------|-----------------|--------------|------|
| 1  | 114.34  | 1.37            | -99.08 | 1.82            | 108.91  | 1.20            | 141.77  | 1.68            | 3            | lis  |
| 2  | 20.66   | 0.83            | 85.45  | 1.39            | -27.82  | 1.30            | -17.95  | 1.43            | 2            | eis  |
| 3  | 107.67  | 2.30            | 48.19  | 1.47            | 98.26   | 2.63            | 130.68  | 2.83            | 3            | alt  |
| 4  | -5.13   | 2.08            | -36.44 | 2.86            | -54.21  | 3.90            | -52.83  | 3.35            | 5            | ban  |
| 5  | 48.44   | 1.04            | -23.38 | 2.40            | -116.96 | 3.42            | -92.24  | 3.27            | 5            | kan  |
| 6  | 113.19  | 0.40            | -46.58 | 1.31            | 13.18   | 2.48            | 53.14   | 2.08            | 2            | hel  |
| 7  | 83.48   | 0.33            | 77.82  | 0.49            | 64.06   | 0.64            | 90.99   | 0.67            | 2            | bug  |
| 8  | 21.88   | 1.40            | -63.43 | 1.52            | -93.55  | 2.35            | -79.98  | 2.08            | 5            | kam  |
| 9  | 84.67   | 0.62            | -5.66  | 0.25            | 131.61  | 1.93            | 153.36  | 1.57            | 2            | bot  |
| 10 | 58.81   | 1.11            | 42.64  | 1.42            | -79.60  | 1.96            | -52.54  | 2.03            | 8            | WNG  |
| 11 | 2.70    | 0.12            | 22.86  | 3.09            | -20.25  | 2.14            | -17.72  | 1.73            | 3            | bor  |
| 12 | 118.87  | 0.72            | 27.53  | 0.93            | -138.68 | 2.88            | -84.93  | 2.59            | 4            | kob  |
| 13 | 82.45   | 0.82            | -30.34 | 2.38            | -55.52  | 2.23            | -21.38  | 2.23            | 4            | goe  |
| 14 | 31.96   | 2.19            | -22.17 | 3.05            | -132.76 | 2.29            | -111.81 | 1.77            | 4            | tan  |
| 15 | 65.15   | 2.44            | 27.80  | 2.31            | 132.65  | 1.57            | 147.75  | 2.08            | 4            | hop  |
| 16 | -11.77  | 3.36            | 23.77  | 2.19            | -70.04  | 2.05            | -69.15  | 1.46            | 3            | eml  |
| 17 | 1.68    | 1.07            | -35.88 | 0.65            | -79.32  | 3.01            | -73.29  | 2.00            | 2            | jeg  |
| 18 | -10.03  | 1.23            | 6.89   | 2.18            | -82.86  | 3.09            | -80.51  | 2.80            | 4            | lie  |
| 19 | -16.83  | 0.56            | -2.76  | 0.89            | -88.32  | 2.11            | -88.16  | 1.68            | 8            | NGK  |
| 20 | 37.45   | 1.05            | 12.52  | 1.71            | -43.19  | 3.05            | -25.25  | 3.04            | 3            | tel  |
| 21 | -21.26  | 0.61            | 5.29   | 2.87            | -64.74  | 2.66            | -67.84  | 2.63            | 3            | sch  |
| 22 | 5.80    | 2.64            | 7.65   | 1.97            | -69.87  | 4.77            | -62.06  | 4.51            | 3            | kee  |
| 23 | -10.22  | 0.11            | 14.11  | 0.24            | -61.86  | 4.45            | -60.82  | 4.08            | 3            | cla  |
| 24 | -24.35  | 1.33            | 19.92  | 1.15            | -71.30  | 3.10            | -74.89  | 2.56            | 4            | gtt  |
| 25 | -161.88 | 0.51            | 52.36  | 1.19            | -31.80  | 1.51            | -91.85  | 1.38            | 4            | col  |
| 26 | -74.22  | 0.80            | -65.09 | 1.21            | -11.93  | 2.44            | -41.21  | 2.24            | 4            | deu  |
| 27 | 58.34   | 1.61            | -41.05 | 2.13            | -22.29  | 1.97            | 2.28    | 1.88            | 4            | die  |
| 28 | -14.09  | 2.77            | 0.21   | 1.70            | -72.42  | 4.71            | -72.08  | 3.48            | 3            | eub  |
| 29 | 0.73    | 0.73            | 18.97  | 2.75            | 125.59  | 2.91            | 115.46  | 2.57            | 4            | gru  |
| 30 | -21.58  | 2.39            | 21.11  | 2.62            | -32.81  | 3.51            | -38.63  | 4.11            | 4            | obe  |
| 31 | -43.61  | 1.59            | -10.52 | 4.50            | -72.65  | 2.50            | -84.15  | 2.87            | 5            | sos  |
| 32 | -18.60  | 0.52            | -22.93 | 2.47            | -65.68  | 2.15            | -67.84  | 1.78            | 5            | eil  |
| 33 | -21.96  | 1.37            | -44.89 | 2.22            | -44.18  | 3.24            | -49.45  | 3.12            | 5            | ebe  |
| 34 | 32.35   | 3.07            | -90.11 | 1.46            | 16.88   | 3.91            | 28.72   | 4.33            | 5            | rad  |
| 35 | 16.27   | 0.52            | -8.75  | 2.24            | -56.36  | 3.04            | -44.80  | 2.84            | 5            | won  |
| 36 | 28.27   | 1.01            | -35.20 | 4.43            | -1.62   | 4.51            | 10.38   | 3.84            | 4            | nos  |
| 37 | 95.83   | 1.87            | -24.95 | 4.11            | 75.11   | 2.66            | 108.33  | 2.99            | 5            | mer  |
| 38 | -7.47   | 1.15            | -23.39 | 4.47            | -46.47  | 1.96            | -45.67  | 2.16            | 5            | gai  |
| 39 | -1.78   | 1.93            | 16.13  | 0.85            | 8.32    | 3.10            | 6.79    | 3.10            | 4            | ber  |
| 40 | -22.71  | 0.71            | -21.02 | 1.30            | -17.41  | 2.42            | -25.80  | 2.54            | 3            | poi  |
| 41 | -7.37   | 1.46            | -24.25 | 2.90            | -8.97   | 2.85            | -11.35  | 2.44            | 5            | wit  |
| 42 | 11.92   | 1.37            | -30.26 | 1.86            | 7.11    | 2.41            | 11.73   | 1.71            | 5            | BFO  |
| 43 | -10.44  | 0.85            | -9.30  | 0.74            | 2.70    | 3.03            | -2.27   | 2.67            | 8            | FUR  |
| 44 | -53.39  | 2.17            | 13.90  | 2.40            | 87.01   | 2.61            | 54.84   | 1.95            | 4            | kar  |
| 45 | 16.66   | 2.24            | -35.73 | 0.17            | 34.68   | 2.01            | 38.26   | 1.98            | 4            | oet  |
| 46 | -12.71  | 1.08            | 11.92  | 3.41            | -41.17  | 3.68            | -42.04  | 3.34            | 2            | lin  |

Magnetic field components X, Y, Z and F with their standard deviations  $\sigma$ , \* Number of used data points in time series.

Table S7: Comparison of X and Y lithospheric anomaly estimates for Germany.

| Data-X | R-SCHA-X | X-EMM-720 | X-EMM-200 | Data-Y | R-SCHA-Y | Y-EMM-720 | Y-EMM-200 | Code |
|--------|----------|-----------|-----------|--------|----------|-----------|-----------|------|
| 114.3  | 67.1     | 126.1     | 51.8      | -99.1  | -58.2    | -60.3     | 4.4       | lis  |
| 20.7   | 9        | 25.7      | 48.2      | 85.5   | 79.2     | 82.5      | -2.2      | eis  |
| 107.7  | -28.8    | 67        | 62.8      | 48.2   | 19.7     | 12.1      | -23.6     | alt  |
| -5.1   | 71.6     | 45        | 55.4      | -36.4  | -88.6    | -25.2     | -26.7     | ban  |
| 48.4   | 86.1     | 81        | 61.7      | -23.4  | 33.6     | -13.9     | -32.9     | kan  |
| 113.2  | 47.8     | 79.4      | 63.5      | -46.6  | -11.5    | -1.7      | -12.3     | hel  |
| 83.5   | 11.2     | 63.7      | 67.3      | 77.8   | 67.6     | 36.4      | -28.8     | bug  |
| 21.9   | 41.9     | 44.1      | 69.4      | -63.4  | -36.5    | -48.3     | -22.5     | kam  |
| 84.7   | -13.5    | 66        | 57.4      | -5.7   | -10.4    | -33.6     | -41.7     | bot  |
| 58.8   | 47.8     | 62.4      | 49.9      | 42.6   | 18.4     | 17        | 39.2      | WNG  |
| 2.7    | 39.8     | 32.6      | 30.6      | 22.9   | 21.4     | 10.8      | -5.7      | bor  |
| 118.9  | 137.2    | 135.6     | 77.9      | 27.5   | 33.6     | -6.2      | -31.2     | kob  |
| 82.5   | 95.8     | 75.3      | 47.4      | -30.3  | -23.2    | -29.6     | -51.6     | goe  |
| 32     | 33       | 46.4      | 52.7      | -22.2  | 10.3     | -33.8     | -43.3     | tan  |
| 65.2   | 1.5      | 45.3      | 42.4      | 27.8   | -4.6     | -11.8     | -24.7     | hop  |
| -11.8  | 28.1     | 18.3      | 37        | 23.8   | 43.7     | 47.6      | 28.7      | eml  |
| 1.7    | 43.4     | 16.6      | 25.5      | -35.9  | -25.8    | -23       | -44       | jeg  |
| -10    | -7.8     | 7.9       | 19        | 6.9    | -13.6    | -36.5     | -55.2     | lie  |
| -16.8  | -4.3     | -8.8      | -11       | -2.8   | 3.1      | -35.8     | -23.2     | NGK  |
| 37.5   | 30.7     | 25.3      | -4.8      | 12.5   | 19.9     | 17.4      | -11       | tel  |
| -21.3  | -12.4    | -7.4      | -8.7      | 5.3    | 12.3     | -1.6      | -21.8     | sch  |
| 5.8    | -18.2    | -9.5      | -2.1      | 7.7    | 3.5      | 26.1      | 24.1      | kee  |
| -10.2  | -17.3    | -7.1      | 8.4       | 14.1   | 24.9     | 9.2       | 12.2      | cla  |
| -24.4  | -14.7    | 1.1       | -0.7      | 19.9   | 14.4     | 14.2      | 12.2      | ggt  |
| -161.9 | -52.6    | -39.1     | -23.8     | 52.4   | 9.9      | -28.4     | -15.8     | col  |
| -74.2  | -44.9    | -47.7     | -42.8     | -65.1  | -43.8    | -53.2     | -66       | deu  |
| 58.3   | -18.4    | 19.2      | -5.3      | -41.1  | -15.9    | -9        | -17.4     | die  |
| -14.1  | -11.5    | 2.9       | -9        | 0.2    | 2.3      | -9.3      | -7.7      | eub  |
| 0.7    | -66.6    | -13       | -3.8      | 19     | 41.2     | 21.2      | 10.8      | gru  |
| -21.6  | -36.2    | -7.5      | -15.3     | 21.1   | 14.2     | -11.7     | -15.4     | obe  |
| -43.6  | -8.9     | -29.4     | -6.9      | -10.5  | 10.9     | 58.9      | 13.5      | sos  |
| -18.6  | -3.9     | -5.8      | 3.9       | -22.9  | -21.4    | -5.1      | -12.6     | eil  |
| -22    | -28.3    | -8.7      | -7        | -44.9  | -9.3     | -19.7     | -10.5     | ebe  |
| 32.4   | -47.7    | 24.1      | -11.6     | -90.1  | -98.9    | -61.9     | -23.7     | rad  |
| 16.3   | 19.3     | 7.1       | 2.7       | -8.8   | -4.5     | -2.4      | 9.7       | won  |
| 28.3   | -22.8    | 21.8      | 17.9      | -35.2  | -11.4    | 1.4       | -1.8      | nos  |
| 95.8   | -22.9    | -1        | -15.5     | -25    | -13.3    | -34       | -30.6     | mer  |
| -7.5   | 4.9      | -2.4      | -6        | -23.4  | -25.1    | -5.9      | -13.7     | gai  |
| -1.8   | -45.2    | -2.9      | 4         | 16.1   | 31.2     | 4.4       | -18       | ber  |
| -22.7  | -47      | -4.3      | -44.9     | -21    | 8.4      | 1         | -18.7     | poi  |
| -7.4   | -8       | 13.2      | 18.3      | -24.3  | -16.4    | -6.5      | -14.9     | wit  |
| 11.9   | -12.9    | 14        | 15.3      | -30.3  | -16.4    | -14.4     | -6.7      | BFO  |
| -10.4  | -27.4    | -11.3     | -12.2     | -9.3   | -7.4     | -18.6     | -5.9      | FUR  |
| -53.4  | -109.7   | -36.9     | -2.4      | 13.9   | 12       | 10.9      | 14.1      | kar  |
| 16.7   | -49.8    | 10.5      | 12.3      | -35.7  | -31.7    | -27.8     | -16.2     | oet  |
| -12.7  | -13.3    | 5.5       | -7.8      | 11.9   | 0.5      | 8.1       | 5.5       | lin  |

Magnetic field components X and Y from ground data (Data), regional model (R-SCHA) and global model (EMM) up to spherical harmonic degree and order 720 or 200, respectively.

Table S8: Comparison of Z and F lithospheric anomaly estimates for Germany

| Data-Z | R-SCHA-Z | Z-EMM-720 | Z-EMM-200 | Data-F | $\delta F$ | F-EMM-720 | F-EMM-200 | Code |
|--------|----------|-----------|-----------|--------|------------|-----------|-----------|------|
| 108.9  | 231.1    | 153.4     | 80.0      | 141.8  | 191.7      | 187.6     | 93.1      | lis  |
| -27.8  | 21.1     | 17.1      | 75.1      | -18.0  | 10.2       | 26.1      | 87.3      | eis  |
| 98.3   | 77.2     | 53.9      | -19.3     | 130.7  | 178.9      | 74.2      | 3.7       | alt  |
| -54.2  | -42.6    | 11.7      | 39.5      | -52.8  | 5.9        | 26.6      | 56.3      | ban  |
| -117.0 | -73.2    | -88.9     | -0.7      | -92.2  | -52.7      | -54.4     | 20.9      | kan  |
| 13.2   | 51.9     | 51.0      | -31.1     | 53.1   | 92.2       | 76.3      | -6.1      | hel  |
| 64.1   | -1.6     | -2.7      | -57.7     | 91.0   | 109.6      | 21.1      | -30.1     | bug  |
| -93.6  | -52.3    | -34.1     | -14.5     | -80.0  | -41.0      | -16.5     | 11.3      | kam  |
| 131.6  | 115.7    | 74.5      | 0.1       | 153.4  | 155.1      | 93.0      | 20.6      | bot  |
| -79.6  | -52.1    | -54.4     | -39.1     | -52.5  | -24.4      | -27.6     | -17.8     | WNG  |
| -20.3  | -11.7    | 11.5      | 36.6      | -17.7  | 20.3       | 22.8      | 45.3      | bor  |
| -138.7 | 9.0      | -89.1     | -95.5     | -84.9  | -36.0      | -33.5     | -61.0     | kob  |
| -55.5  | 22.1     | -22.9     | -10.8     | -21.4  | 12.4       | 6.2       | 6.8       | goe  |
| -132.8 | -103.7   | -107.4    | -44.8     | -111.8 | -66.5      | -83.1     | -22.9     | tan  |
| 132.7  | 33.4     | 28.4      | -62.3     | 147.8  | 152.6      | 43.0      | -42.4     | hop  |
| -70.0  | -80.2    | -42.4     | -7.0      | -69.2  | -45.9      | -32.0     | 7.7       | eml  |
| -79.3  | -47.8    | -35.5     | -30.6     | -73.3  | -40.2      | -26.9     | -19.2     | jeg  |
| -82.9  | -72.0    | -108.5    | -142.5    | -80.5  | -30.7      | -98.3     | -125.8    | lie  |
| -88.3  | -63.1    | -48.5     | -43.6     | -88.2  | -31.8      | -48.8     | -44.8     | NGK  |
| -43.2  | 9.5      | -6.3      | 10.1      | -25.3  | -1.7       | 4.2       | 7.4       | tel  |
| -64.7  | -59.0    | -29.6     | -25.4     | -67.8  | -32.3      | -30.2     | -27.1     | sch  |
| -69.9  | -72.1    | -51.6     | -94.5     | -62.1  | -40.2      | -51.1     | -87.7     | kee  |
| -61.9  | -71.6    | -25.3     | -35.6     | -60.8  | -46.2      | -25.9     | -29.4     | cla  |
| -71.3  | -69.4    | -54.4     | -49.0     | -74.9  | -51.2      | -49.4     | -45.2     | ggt  |
| -31.8  | -58.6    | -7.2      | -9.2      | -91.9  | 19.1       | -22.5     | -18.1     | col  |
| -11.9  | -49.2    | -54.6     | -37.1     | -41.2  | 8.9        | -69.9     | -52.2     | deu  |
| -22.3  | 16.5     | -19.3     | -5.9      | 2.3    | 24.8       | -10.3     | -7.8      | die  |
| -72.4  | -68.6    | -67.7     | -52.9     | -72.1  | -50.2      | -61.0     | -52.1     | eub  |
| 125.6  | 38.1     | 36.3      | -19.1     | 115.5  | 129.7      | 28.3      | -18.9     | gru  |
| -32.8  | -54.7    | -42.5     | -43.5     | -38.6  | -24.4      | -42.0     | -46.2     | obe  |
| -72.7  | -33.1    | -29.8     | -11.3     | -84.2  | -31.7      | -38.1     | -12.9     | sos  |
| -65.7  | -55.1    | -39.7     | -14.9     | -67.8  | -43.4      | -38.7     | -12.2     | eil  |
| -44.2  | -21.8    | 12.2      | 7.8       | -49.5  | -25.5      | 7.4       | 4.2       | ebe  |
| 16.9   | 29.8     | 33.5      | 21.0      | 28.7   | 48.5       | 40.2      | 14.3      | rad  |
| -56.4  | -44.4    | -27.9     | -23.9     | -44.8  | -17.4      | -22.5     | -20.6     | won  |
| -1.6   | -21.3    | -14.4     | -37.7     | 10.4   | -1.0       | -3.9      | -26.7     | nos  |
| 75.1   | 42.7     | 1.0       | -7.5      | 108.3  | 115.2      | 0.1       | -13.7     | mer  |
| -46.5  | -42.9    | -23.2     | -31.0     | -45.7  | -22.0      | -22.2     | -30.9     | gai  |
| 8.3    | -5.1     | 9.4       | -17.4     | 6.8    | 20.0       | 7.3       | -14.1     | ber  |
| -17.4  | 0.3      | -17.0     | -16.6     | -25.8  | -18.6      | -17.1     | -34.6     | poi  |
| -9.0   | -11.0    | -16.7     | 7.3       | -11.4  | 3.3        | -9.3      | 14.4      | wit  |
| 7.1    | -24.2    | -13.0     | 11.2      | 11.7   | 2.5        | -5.7      | 16.6      | BFO  |
| 2.7    | -22.6    | 2.7       | 2.3       | -2.3   | -15.9      | -2.8      | -3.3      | FUR  |
| 87.0   | 22.4     | 50.1      | 25.3      | 54.8   | 86.1       | 29.0      | 21.9      | kar  |
| 34.7   | 40.9     | 9.8       | -15.9     | 38.3   | 63.9       | 13.2      | -8.9      | oet  |
| -41.2  | -33.4    | -17.6     | -17.4     | -42.0  | -15.2      | -13.2     | -18.9     | lin  |

Magnetic field components Z and F from ground data (Data), regional model (R-SCHA) or high resolution aeromagnetic map ( $\delta F$ ) and global model (EMM) up to spherical harmonic degree and order 720 or 200, respectively.



## S2 Supplemental figure

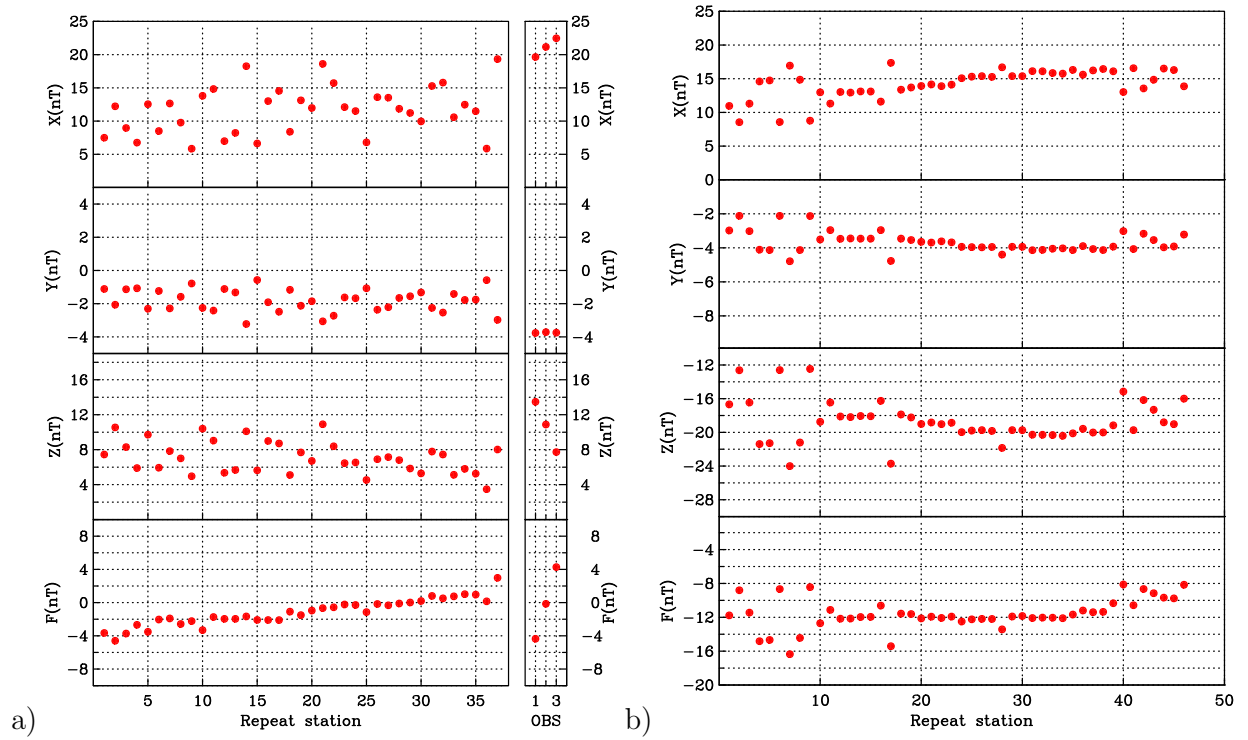

Figure S1: Differences between lithospheric anomaly estimates in the a) southern African region and b) Germany without and with consideration of magnetospheric field contributions as described by the GRIMM3 model. Stations as numbered in Tables S1 and S5 and ordered by decreasing geomagnetic latitude from left to right.
